# Supplementary material for: Novel machine learning approach toward classification model of HIV-1 integrase inhibitors
Source: Royal Society of Chemistry journal article supplement (doi:10.1039/d4ra02231a), 2024-01-01
Supplement: d4ra02231a1.pdf [file d4ra02231a1.pdf]

# Novel machine learning approach toward classification model of HIV-1 integrase inhibitors

Tieu-Long Phan<sup>a, b</sup>, The-Chuong Trinh<sup>c</sup>, Van-Thinh To<sup>d</sup>, Thanh-An Pham<sup>d</sup>, Phuoc-Chung Van  
Nguyen<sup>d</sup>, Tuyet-Minh Phan<sup>d</sup>, Tuyen Ngoc Truong<sup>\*d</sup>

## Corresponding Author

\*Tuyen Ngoc Truong, Email: [truongtuyen@ump.edu.vn](mailto:truongtuyen@ump.edu.vn). Phone: +84 903330604.

<sup>a</sup>Department of Organic Chemistry, Faculty of Pharmacy, University of Medicine and Pharmacy  
at Ho Chi Minh City, Ho Chi Minh City, Vietnam.

**Data Availability:** All datasets used in our research could be downloaded freely from the  
[ChEMBL database](#), the raw data and virtual screening data are available online at  
[https://github.com/Medicine-Artificial-Intelligence/HIV\\_IN\\_Classification\\_ML/tree/main/Data](https://github.com/Medicine-Artificial-Intelligence/HIV_IN_Classification_ML/tree/main/Data).  
16 different molecular descriptor and fingerprint were calculated by [this notebook](#).

## Table S1. Compare processing and feature selection of 16 types of data

Table S1. Compare processing and feature selection of 16 types of data

|                | Number of features | Number of features after threshold analysis of variance | Number of outliers | Number of features selected |
|----------------|--------------------|---------------------------------------------------------|--------------------|-----------------------------|
| <b>Avalon</b>  | 1025               | 801                                                     | 118                | 221                         |
| <b>Cats2d</b>  | 211                | 174                                                     | 195                | 53                          |
| <b>ECFP2</b>   | 2049               | 99                                                      | 0                  | 28                          |
| <b>ECFP4</b>   | 2049               | 151                                                     | 0                  | 51                          |
| <b>ECFP6</b>   | 4097               | 170                                                     | 6                  | 56                          |
| <b>MACCs</b>   | 168                | 109                                                     | 3                  | 38                          |
| <b>Map4</b>    | 1025               | 1022                                                    | 0                  | 230                         |
| <b>Mol2vec</b> | 300                | 301                                                     | 43                 | 89                          |
| <b>Mordred</b> | 1613               | 793                                                     | 36                 | 221                         |

|                |       |      |     |     |
|----------------|-------|------|-----|-----|
| <b>Ph4</b>     | 39973 | 1593 | 86  | 454 |
| <b>Pubchem</b> | 882   | 291  | 32  | 82  |
| <b>RDK5</b>    | 2049  | 1443 | 56  | 361 |
| <b>RDK6</b>    | 2049  | 2003 | 78  | 518 |
| <b>RDK7</b>    | 4097  | 4059 | 112 | 954 |
| <b>RDKdes</b>  | 209   | 140  | 78  | 53  |
| <b>Secfp</b>   | 2049  | 245  | 1   | 74  |

**Table S2. Wilcoxon signed rank test for meta-analysis of 16 datasets****Table S2. Wilcoxon signed rank test for meta-analysis of 16 datasets**

|                | <b>Avalon</b> | <b>Cats2d</b> | <b>ECFP2</b> | <b>ECFP4</b> | <b>ECFP6</b> | <b>MACCs</b> | <b>Map4</b> | <b>Mol2vec</b> | <b>Mordred</b> | <b>Ph4</b> | <b>Pubchem</b> | <b>RDk5</b> | <b>RDk6</b> | <b>RDk7</b> | <b>RDkdes</b> | <b>Secfp</b> |
|----------------|---------------|---------------|--------------|--------------|--------------|--------------|-------------|----------------|----------------|------------|----------------|-------------|-------------|-------------|---------------|--------------|
| <b>Avalon</b>  | 1.000         | 0.000         | 0.000        | 0.000        | 0.000        | 0.000        | 0.000       | 0.000          | 0.000          | 0.000      | 0.000          | 0.813       | 0.870       | 0.009       | 0.000         | 0.021        |
| <b>Cats2d</b>  | 0.000         | 1.000         | 0.000        | 0.000        | 0.000        | 0.000        | 0.000       | 0.000          | 0.000          | 0.000      | 0.000          | 0.000       | 0.000       | 0.000       | 0.000         | 0.000        |
| <b>ECFP2</b>   | 0.000         | 0.000         | 1.000        | 1.000        | 0.014        | 0.000        | 0.241       | 1.000          | 0.870          | 1.000      | 0.208          | 0.000       | 0.000       | 0.000       | 1.000         | 0.000        |
| <b>ECFP4</b>   | 0.000         | 0.000         | 1.000        | 1.000        | 0.871        | 0.000        | 1.000       | 1.000          | 1.000          | 1.000      | 0.000          | 0.001       | 0.000       | 0.000       | 1.000         | 0.022        |
| <b>ECFP6</b>   | 0.000         | 0.000         | 0.014        | 0.871        | 1.000        | 0.000        | 1.000       | 0.043          | 1.000          | 0.008      | 0.000          | 0.235       | 0.109       | 0.000       | 0.098         | 0.349        |
| <b>MACCs</b>   | 0.000         | 0.000         | 0.000        | 0.000        | 0.000        | 1.000        | 0.000       | 0.000          | 0.000          | 0.000      | 1.000          | 0.000       | 0.000       | 0.000       | 0.000         | 0.000        |
| <b>Map4</b>    | 0.000         | 0.000         | 0.241        | 1.000        | 1.000        | 0.000        | 1.000       | 1.000          | 1.000          | 0.720      | 0.000          | 0.003       | 0.000       | 0.000       | 1.000         | 0.463        |
| <b>Mol2vec</b> | 0.000         | 0.000         | 1.000        | 1.000        | 0.043        | 0.000        | 1.000       | 1.000          | 1.000          | 1.000      | 0.001          | 0.000       | 0.000       | 0.000       | 1.000         | 0.000        |
| <b>Mordred</b> | 0.000         | 0.000         | 0.870        | 1.000        | 1.000        | 0.000        | 1.000       | 1.000          | 1.000          | 0.219      | 0.000          | 0.007       | 0.000       | 0.000       | 1.000         | 0.159        |
| <b>Ph4</b>     | 0.000         | 0.000         | 1.000        | 1.000        | 0.008        | 0.000        | 0.720       | 1.000          | 0.219          | 1.000      | 0.019          | 0.000       | 0.000       | 0.000       | 1.000         | 0.001        |
| <b>Pubchem</b> | 0.000         | 0.000         | 0.208        | 0.000        | 0.000        | 1.000        | 0.000       | 0.001          | 0.000          | 0.019      | 1.000          | 0.000       | 0.000       | 0.000       | 0.040         | 0.000        |
| <b>RDk5</b>    | 0.813         | 0.000         | 0.000        | 0.001        | 0.235        | 0.000        | 0.003       | 0.000          | 0.007          | 0.000      | 0.000          | 1.000       | 1.000       | 0.000       | 0.000         | 1.000        |
| <b>RDk6</b>    | 0.870         | 0.000         | 0.000        | 0.000        | 0.109        | 0.000        | 0.000       | 0.000          | 0.000          | 0.000      | 0.000          | 1.000       | 1.000       | 0.000       | 0.000         | 0.463        |
| <b>RDk7</b>    | 0.009         | 0.000         | 0.000        | 0.000        | 0.000        | 0.000        | 0.000       | 0.000          | 0.000          | 0.000      | 0.000          | 0.000       | 0.000       | 1.000       | 0.000         | 0.000        |
| <b>RDkdes</b>  | 0.000         | 0.000         | 1.000        | 1.000        | 0.098        | 0.000        | 1.000       | 1.000          | 1.000          | 1.000      | 0.040          | 0.000       | 0.000       | 0.000       | 1.000         | 0.000        |
| <b>Secfp</b>   | 0.021         | 0.000         | 0.000        | 0.022        | 0.349        | 0.000        | 0.463       | 0.000          | 0.159          | 0.001      | 0.000          | 1.000       | 0.463       | 0.000       | 0.000         | 1.000        |

**\*p = 0.000 mean p < 0.00**

**Table S3. The results of features selection comparison**

**Table S3. The results of features selection comparison**

| <b>Model</b>         | <b>Number fingerprints</b> | <b>ofMean</b> | <b>Median</b> | <b>Outliers</b> | <b>Compared to baseline</b> |
|----------------------|----------------------------|---------------|---------------|-----------------|-----------------------------|
| <b>Baseline</b>      | 4078                       | 0.820         | 0.822         | 0               |                             |
| <b>Chi2</b>          | 20                         | 0.777         | 0.780         | 0               | p < 0,05                    |
| <b>Mutual</b>        | 20                         | 0.766         | 0.766         | 1               | p < 0,05                    |
| <b>RF</b>            | 954                        | 0.815         | 0.819         | 0               | NS                          |
| <b>ExT</b>           | 924                        | 0.814         | 0.818         | 0               | NS                          |
| <b>ADA</b>           | 50                         | 0.813         | 0.817         | 4               | NS                          |
| <b>Grad</b>          | 293                        | 0.811         | 0.811         | 0               | NS                          |
| <b>XGB</b>           | 533                        | 0,819         | 0,821         | 0               | NS                          |
| <b>Logic</b>         | 744                        | 0,819         | 0,830         | 0               | NS                          |
| *NS: not significant |                            |               |               |                 |                             |

**Table S4. Hyperparameters of optimization step**

**Table S4. Hyperparameters of optimization step**

| <b>Hyperparameters</b>   | <b>Values</b>          |
|--------------------------|------------------------|
| <b>sampling_strategy</b> | 0.6080363095456893     |
| <b>max_depth</b>         | 5                      |
| <b>min_child_weight</b>  | 1                      |
| <b>learning_rate</b>     | 0.13853526499953608    |
| <b>n_estimators</b>      | 54                     |
| <b>gamma</b>             | 0.0016145215090081605  |
| <b>reg_alpha</b>         | 3.3173836339552476e-07 |
| <b>reg_lambda</b>        | 5.833565947119527e-06  |
| <b>subsample</b>         | 0.8893106963312789     |
| <b>colsample_bytree</b>  | 0.6351067897414812     |

**Figure S1. Feature selection models comparison using the Wilcoxon signed-rank test**

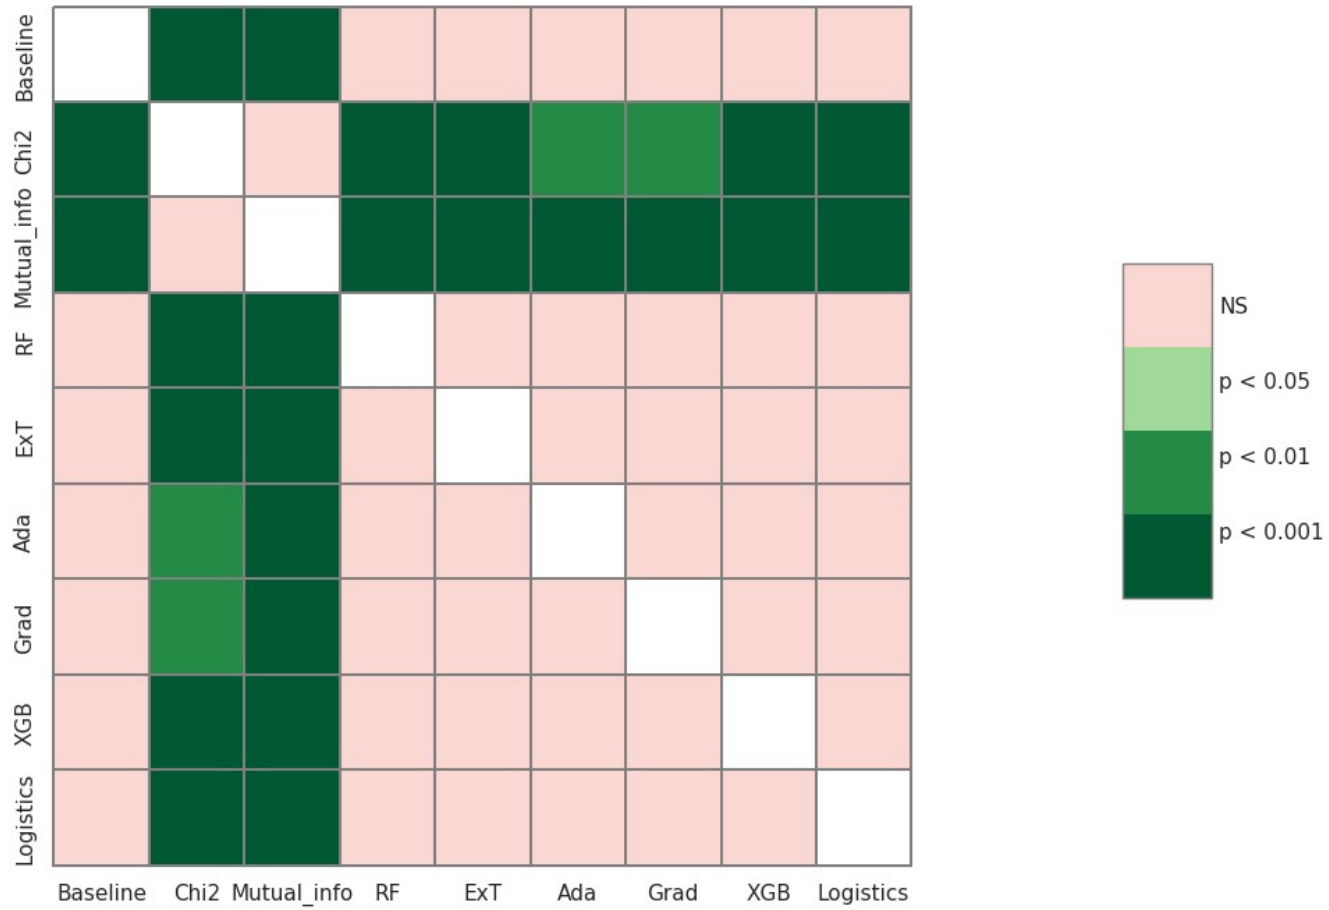

**Figure S1. Feature selection models comparison using the Wilcoxon signed-rank test**
